# Supplementary material
Source: publisher site journal article supplement (https://www.spandidos-publications.com/5100/downloadSupplementary)
Supplement: Supplementary file 1 [file downloadSupplementary]

## Sheet: Table S3
Table SIII The P-value of expression of DNase family genes in tumor and adjacent normal tissues.
Cancer type	DNASE1	DNASE1L1	DNASE1L2	DNASE1L3	DNASE2	DNASE2B
BLCA	0.00101783	0.000663385	2.73e-09	0.000476	4.37e-05	6.56e-08
BRCA	2.2e-16	5e-11	1.03e-83	3.48e-41	1.19e-42	0.483521
CHOL	5.05e-11	1.22e-18	1.39e-07	1.27e-10	2.35e-08	0.790327
COAD	7.88e-05	6.53e-09	8.76e-68	3.96e-21	4.41e-08	8.38e-05
ESCA	0.14656	0.140006	0.00920786	0.99018	0.000831162	0.0466658
GBM	1.97e-05	0.222968	0.584261	0.0067696	1.96e-07	4e-15
HNSC	1.9e-05	0.287737	0.775505	2.79e-05	2.72e-12	0.0765976
KICH	0.118935	1.29e-14	0.10281	2.18e-19	2.94e-12	0.0591566
KIRC	2.05e-23	1.24e-21	1.52e-12	5.98e-43	1.81e-20	3.04e-46
KIRP	2.54e-10	0.00390529	0.188738	1.53e-22	7.73e-07	1.49e-31
LIHC	7.37e-42	2.37e-20	4.76e-33	6.31e-33	1.51e-15	0.0542658
LUAD	4.07e-24	0.238864	2.46e-37	1.02e-18	3.61e-05	6.79e-16
LUSC	3.28e-06	6.01e-07	2.12e-26	2.92e-16	0.498118	3.59e-17
PRAD	5.82e-15	3.18e-06	6.7e-19	0.000245	0.000142088	1.75e-09
READ	4.04e-06	0.000498992	3.2e-20	8.72e-06	0.000649704	0.0727821
STAD	0.456456	0.00633736	1.52e-16	3e-07	3.23e-06	7.57e-12
THCA	3.4e-06	0.744305	4.07e-23	4.06e-09	1.84e-05	0.000271183
UCEC	1.19e-06	0.00575194	6.37e-14	2.81e-09	4.31e-19	0.964759
